# Supplementary material for: Is bismuth(iii) able to inhibit the activity of urease? Puzzling results in the quest for soluble urease complexes for agrochemical and medicinal applications
Source: Royal Society of Chemistry journal article supplement (doi:10.1039/d4dt00778f), 2024-01-01
Supplement: d4dt00778f1.pdf [file d4dt00778f1.pdf]

# Is Bismuth(III) able to inhibit the activity of urease? Puzzling results in the quest for soluble urease complexes for agrochemical and medicinal applications

Laura Contini,<sup>a</sup> Arundhati Paul,<sup>b</sup> Luca Mazzei,<sup>b</sup> Stefano Ciurli,<sup>b,\*</sup> Davide Roncarati,<sup>c,\*</sup> Dario Braga,<sup>a</sup> Fabrizia Grepioni<sup>a,\*</sup>

<sup>a</sup> Department of Chemistry "G. Ciamician", University of Bologna, Via Selmi 2, 40126 Bologna, Italy

<sup>b</sup> Laboratory of Bioinorganic Chemistry, Department of Pharmacy and Biotechnology (FaBiT), University of Bologna, Viale Giuseppe Fanin 40, Bologna I-40127, Italy

<sup>c</sup> Department of Pharmacy and Biotechnology (FaBiT), University of Bologna, Via Selmi 3, 40126 Bologna, Italy

## Electronic Supplementary Information (10 pages)

|                                               |         |
|-----------------------------------------------|---------|
| 1. Powder X-ray diffraction.....              | Page 2  |
| 2. Crystal data and Rietveld refinements..... | Page 4  |
| 3. DSC and TGA .....                          | Page 6  |
| 4. <sup>1</sup> H NMR.....                    | Page 9  |
| 5. Antimicrobial activity tests.....          | Page 10 |

## 1. Powder X-ray diffraction

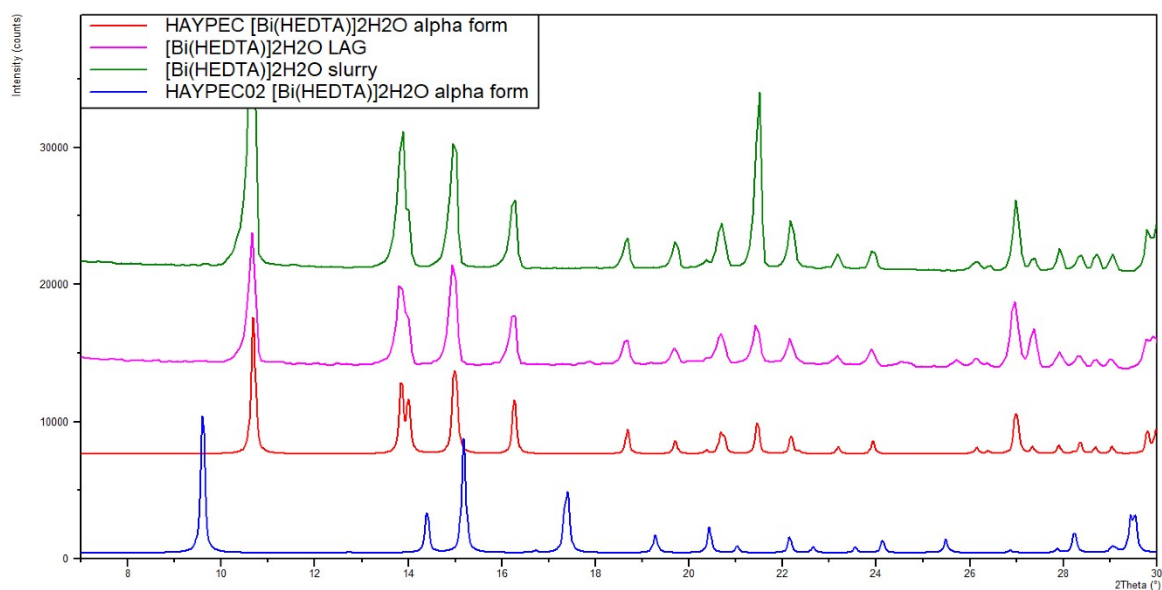

**Figure ESI 1:** Comparison between the experimental PXRD patterns for  $[\text{Bi}(\text{HEDTA})]\cdot 2\text{H}_2\text{O}$  (**1**) obtained via LAG (pink) and slurry (green) and the calculated ones for the  $\beta$  (red) and  $\alpha$  (blue) forms.

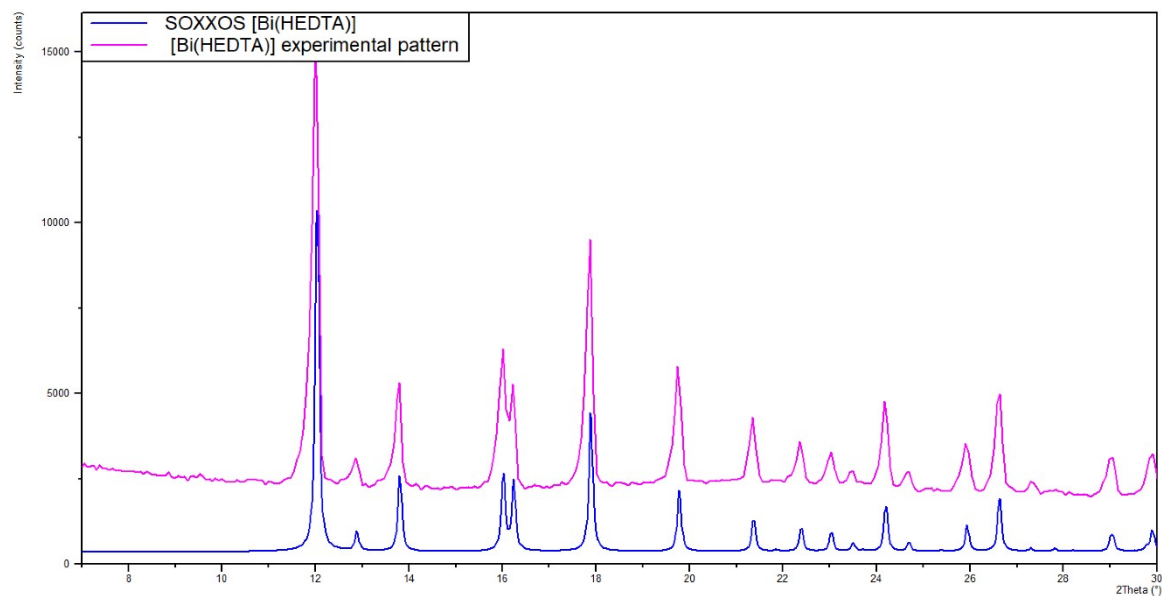

**Figure ESI 2:** Comparison between the experimental PXRD of  $[\text{Bi}(\text{HEDTA})]$  (**2**) obtained via heating of the dehydrated form (pink) and the calculated one of  $[\text{Bi}(\text{Hedta})]$  (blue)

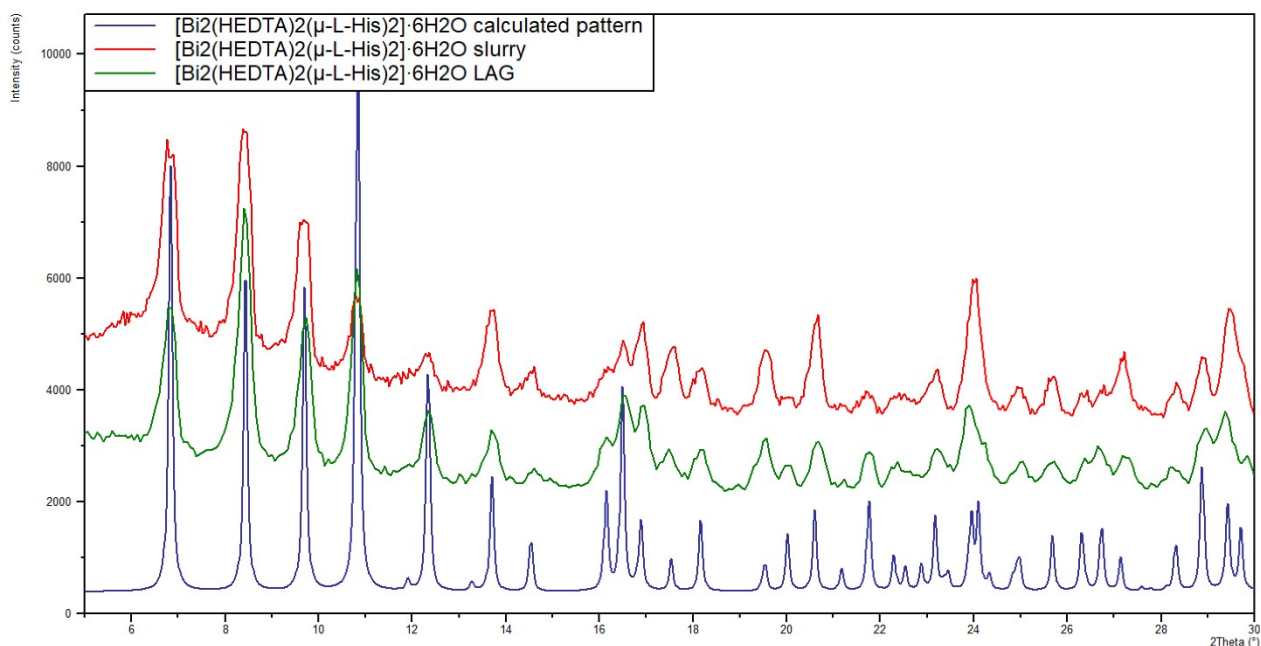

**Figure ESI 3:** Comparison between the experimental PXRD patterns for  $[\text{Bi}_2(\text{HEDTA})_2(\mu\text{-L-His})_2]\cdot 6\text{H}_2\text{O}$  (4) obtained via slurry (red) and LAG (green) and the calculated one (blue).

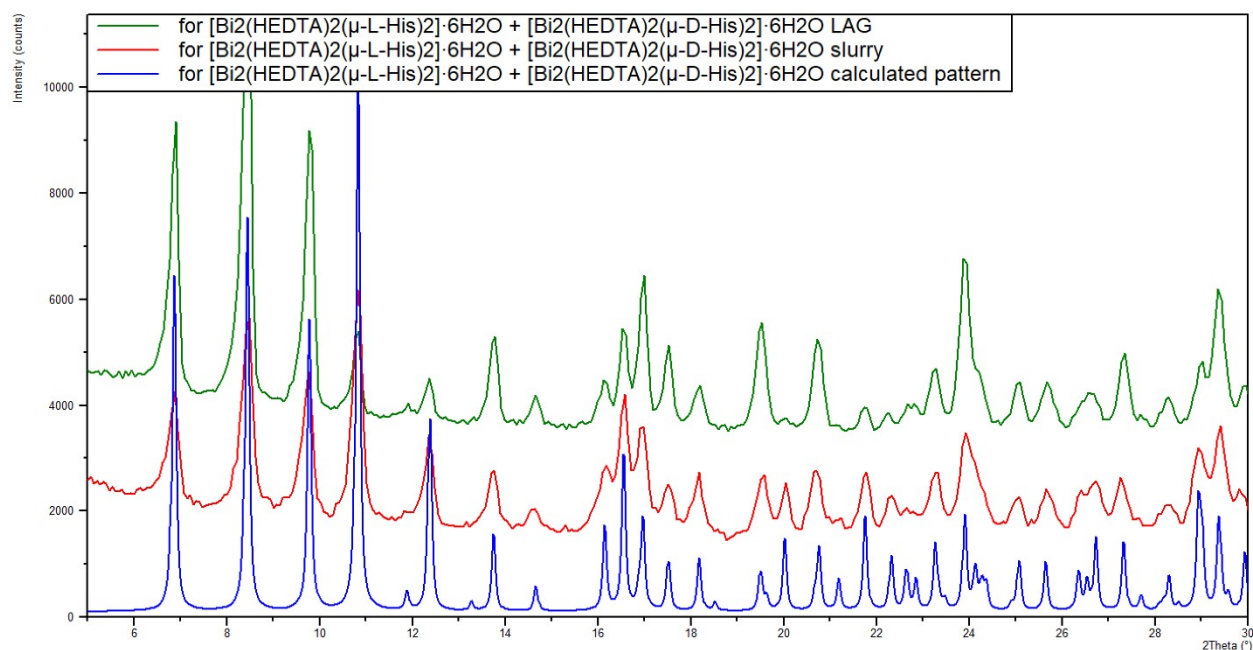

**Figure ESI 4:** Comparison between the experimental PXRD patterns for the conglomerate  $[\text{Bi}_2(\text{HEDTA})_2(\mu\text{-L-His})_2]\cdot 6\text{H}_2\text{O} + [\text{Bi}_2(\text{HEDTA})_2(\mu\text{-L-His})_2]\cdot 6\text{H}_2\text{O}$  (3) obtained via slurry (red) and LAG (green) and the calculated one (blue).

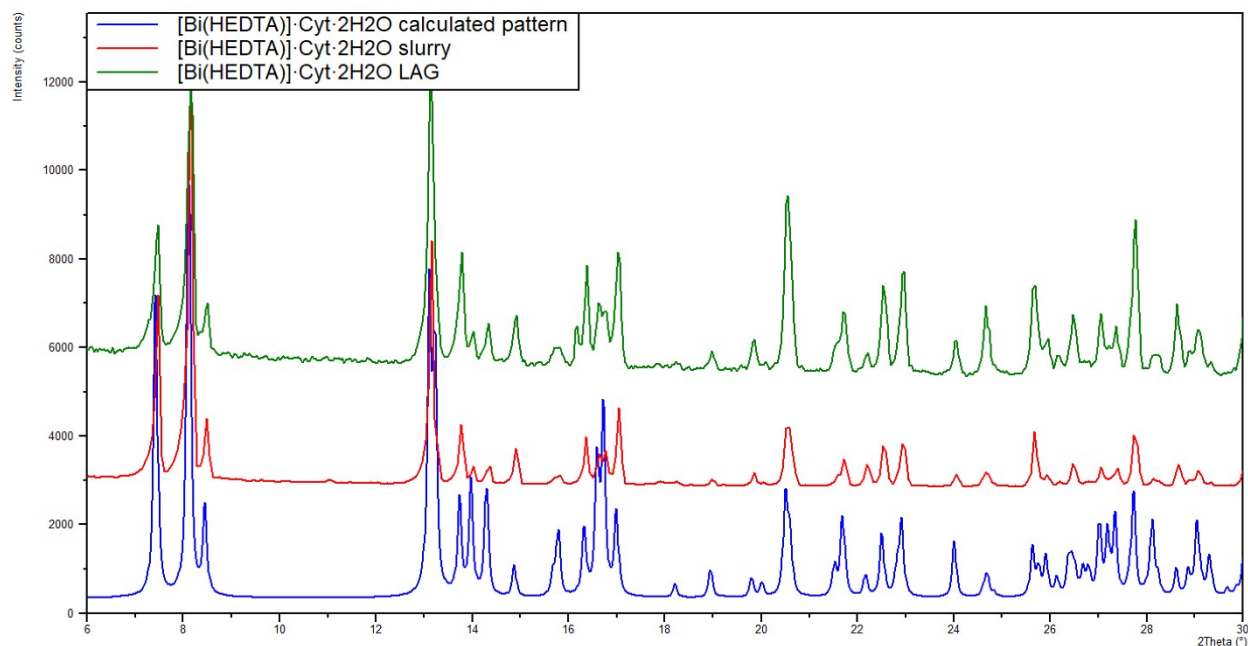

**Figure ESI 5:** Comparison between the experimental PXRD patterns for [Bi(HEDTA)]·Cyt·2H<sub>2</sub>O (**5**) obtained via slurry (red) and LAG (green) and the calculated one (blue).

## 2. Crystal data and Rietveld refinements

**Table ESI 1:** Cell parameters and Rwp values at 293K for the conglomerate [Bi<sub>2</sub>(HEDTA)<sub>2</sub>(μ-L-His)<sub>2</sub>].6H<sub>2</sub>O + [Bi<sub>2</sub>(HEDTA)<sub>2</sub>(μ-D-His)<sub>2</sub>].6H<sub>2</sub>O (**3**), [Bi<sub>2</sub>(HEDTA)<sub>2</sub>(μ-L-His)<sub>2</sub>].6H<sub>2</sub>O (**4**) and

|                                          | [Bi <sub>2</sub> (HEDTA) <sub>2</sub> (μ-L-His) <sub>2</sub> ].6H <sub>2</sub> O +<br>[Bi <sub>2</sub> (HEDTA) <sub>2</sub> (μ-D-His) <sub>2</sub> ].6H <sub>2</sub> O<br>( <b>3</b> ) <sup>a</sup> | [Bi <sub>2</sub> (HEDTA) <sub>2</sub> (μ-L-His) <sub>2</sub> ].6H <sub>2</sub> O<br>( <b>4</b> ) <sup>b</sup> | [Bi(HEDTA)]·Cyt·2H <sub>2</sub> O<br>O<br>( <b>5</b> ) <sup>c</sup> |
|------------------------------------------|-----------------------------------------------------------------------------------------------------------------------------------------------------------------------------------------------------|---------------------------------------------------------------------------------------------------------------|---------------------------------------------------------------------|
| Chemical formula                         | C16 H28 Bi N5 O13                                                                                                                                                                                   | C16 H28 Bi N5 O13                                                                                             | C14 H22 Bi N5 O11                                                   |
| Formula weight<br>(g·mol <sup>-1</sup> ) | 707.399                                                                                                                                                                                             | 707.399                                                                                                       | 645.332                                                             |
| Crystal system                           | Monoclinic                                                                                                                                                                                          | Monoclinic                                                                                                    | Triclinic                                                           |
| Space group                              | C2                                                                                                                                                                                                  | C2                                                                                                            | P-1                                                                 |
| <i>a</i> (Å)                             | 21.358(4)                                                                                                                                                                                           | 21.395(5)                                                                                                     | 13.0539(12)                                                         |
| <i>b</i> (Å)                             | 8.8650(16)                                                                                                                                                                                          | 8.855(2)                                                                                                      | 11.9390(11)                                                         |
| <i>c</i> (Å)                             | 13.125(2)                                                                                                                                                                                           | 13.191(3)                                                                                                     | 6.8072(6)                                                           |
| α (°)                                    | 90.000                                                                                                                                                                                              | 90.000                                                                                                        | 96.318(3)                                                           |
| β (°)                                    | 101.303(4)                                                                                                                                                                                          | 101.901(5)                                                                                                    | 96.953(3)                                                           |
| γ (°)                                    | 90.000                                                                                                                                                                                              | 90.000                                                                                                        | 113.171(2)                                                          |
| <i>V</i> (Å <sup>3</sup> )               | 2436.8(8)                                                                                                                                                                                           | 2445.2(10)                                                                                                    | 953.59(16)                                                          |
| <i>Z</i> , <i>Z'</i>                     | 4,1                                                                                                                                                                                                 | 4,1                                                                                                           | 2, 1                                                                |
| <i>Rwp</i> %                             | 9.792                                                                                                                                                                                               | 10.246                                                                                                        | 8.161                                                               |

[Bi(HEDTA)]·Cyt·2H<sub>2</sub>O (**5**) (all structures from powder data).

<sup>a</sup> Conglomerate: crystal data are reported here with the only purpose of confirming the obtainment of a conglomerate. <sup>b</sup> CCDC number 2340274. <sup>c</sup> CCDC number 2340273.

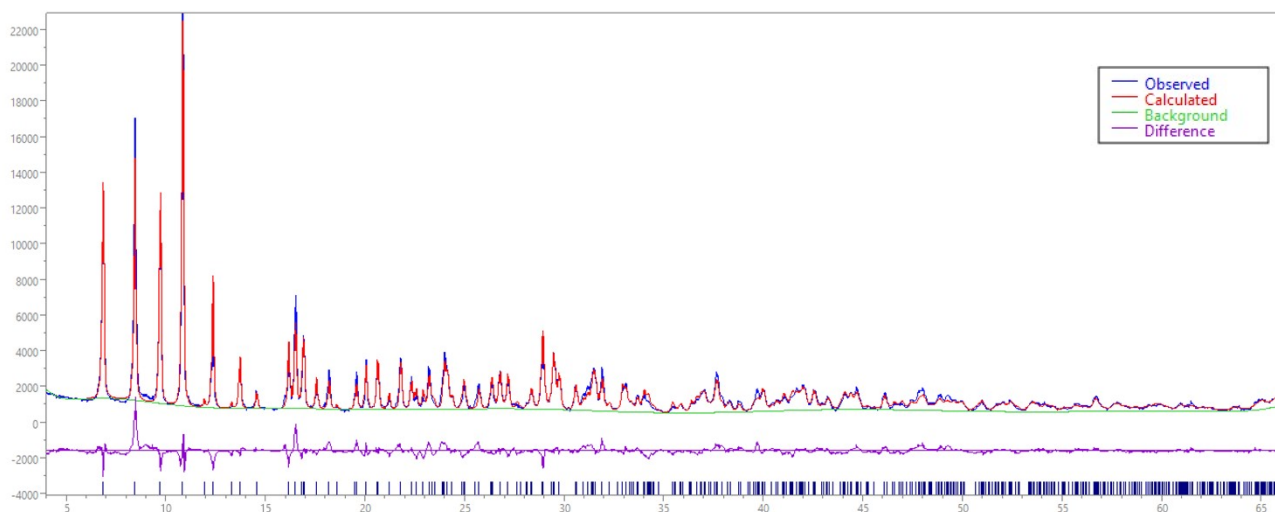

**Figure ESI 6:** Rietveld refinement. Experimental (blue curve), calculated (red curve) background (green curve), and difference (purple curve) powder patterns for  $[\text{Bi}_2(\text{HEDTA})_2(\mu\text{-L-His})_2]\cdot 6\text{H}_2\text{O}$  (**4**).

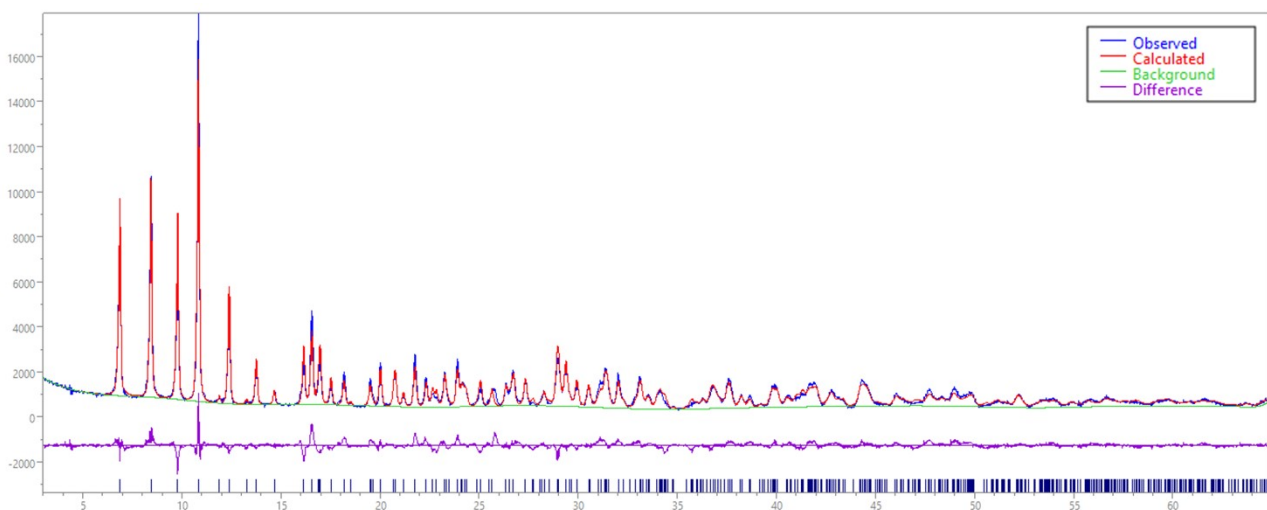

**Figure ESI 7:** Rietveld refinement. Experimental (blue curve), calculated (red curve), background (green curve), and difference (purple curve) powder patterns for the conglomerate  $[\text{Bi}_2(\text{HEDTA})_2(\mu\text{-L-His})_2]\cdot 6\text{H}_2\text{O} + [\text{Bi}_2(\text{HEDTA})_2(\mu\text{-D-His})_2]\cdot 6\text{H}_2\text{O}$  (**3**)

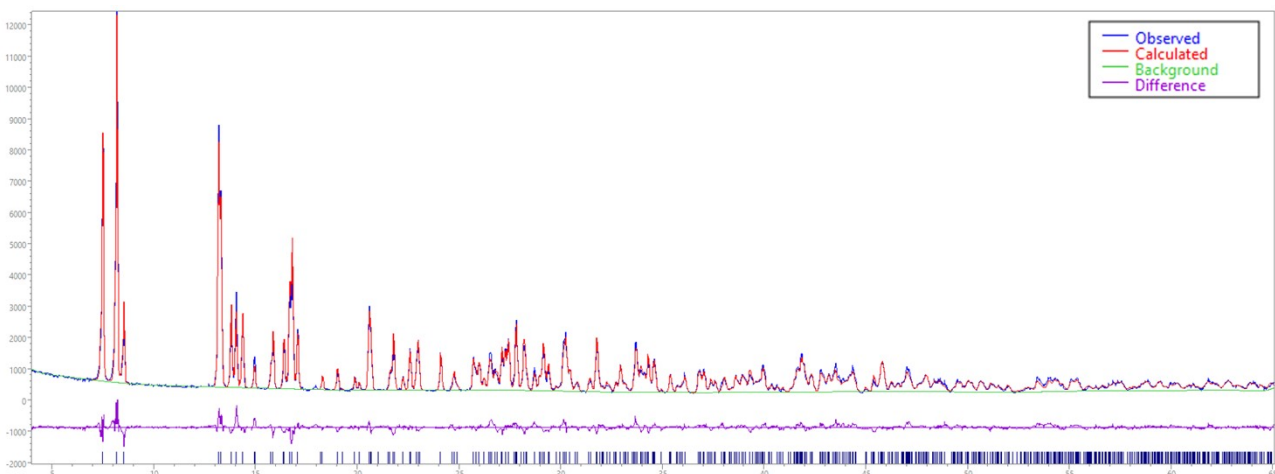

**Figure ESI 8:** Rietveld refinement. Experimental (blue curve), calculated (red curve) background (green curve), and difference (purple curve) powder patterns for [Bi(HEDTA)]·Cyt·2H<sub>2</sub>O (5)

### 3. DSC and TGA

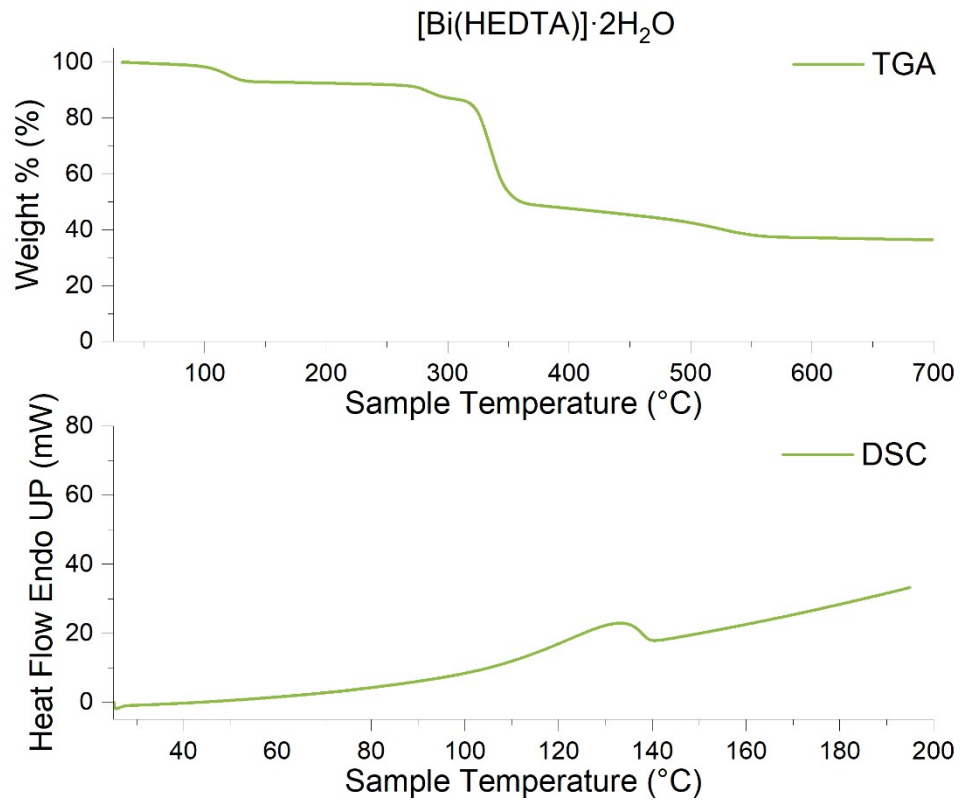

**Figure ESI 9:** TGA and DSC traces for [Bi(HEDTA)]·2H<sub>2</sub>O (1)

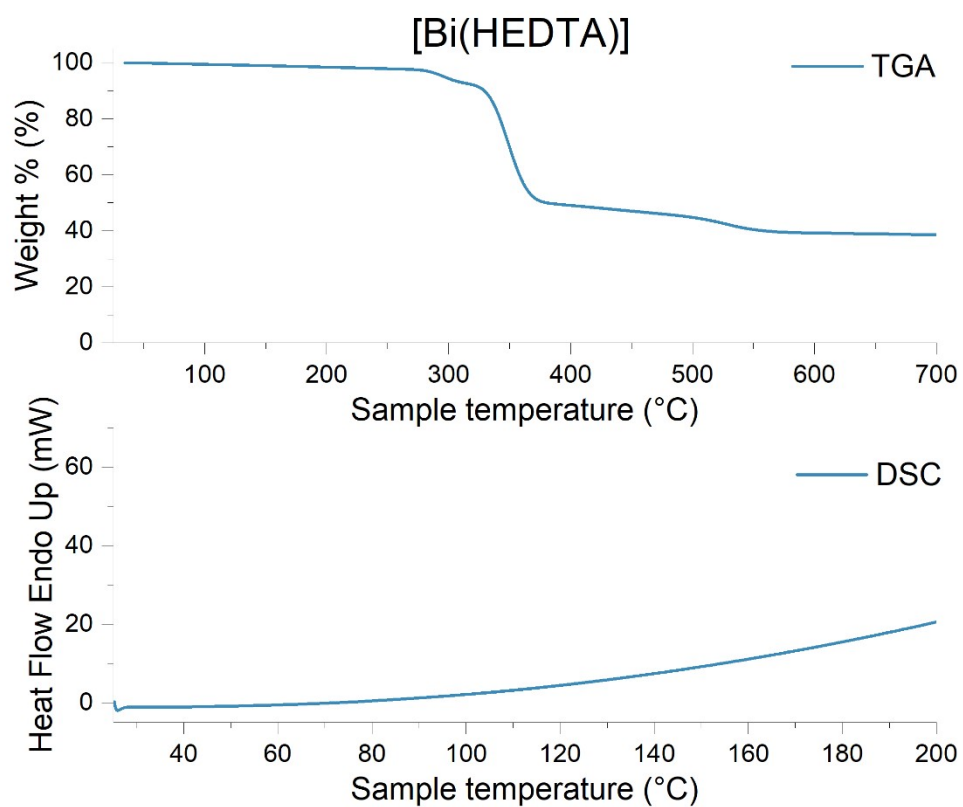

**Figure ESI 10:** TGA and DSC traces for [Bi(HEDTA)] (2)

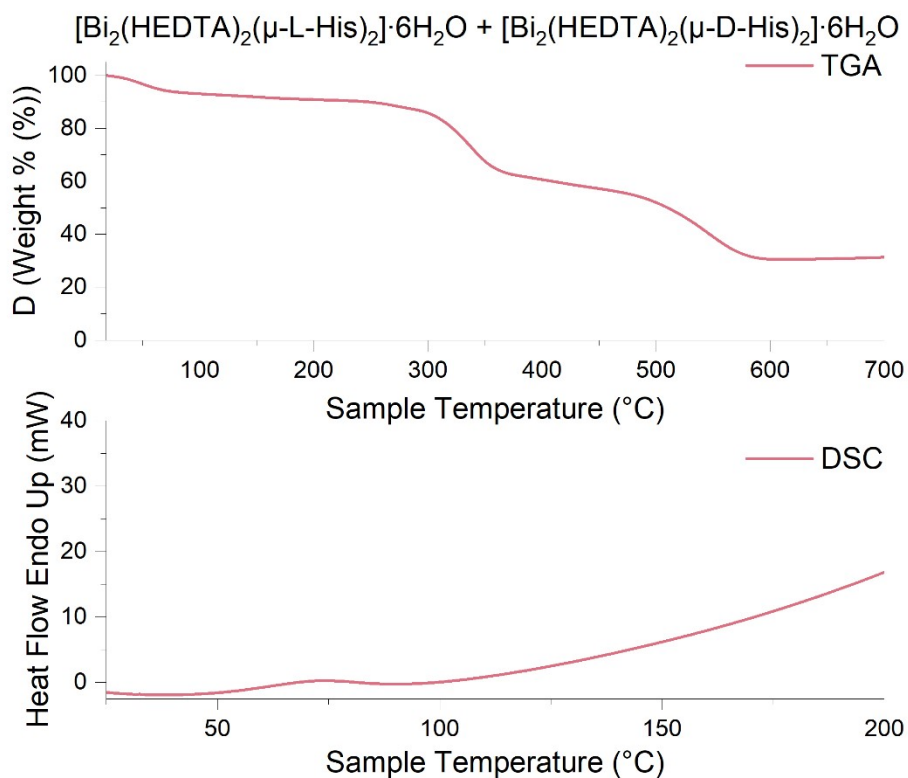

**Figure ESI 11:** TGA and DSC traces for the conglomerate  $[\text{Bi}_2(\text{HEDTA})_2(\mu\text{-L-His})_2]\cdot 6\text{H}_2\text{O} + [\text{Bi}_2(\text{HEDTA})_2(\mu\text{-D-His})_2]\cdot 6\text{H}_2\text{O}$  (**3**)

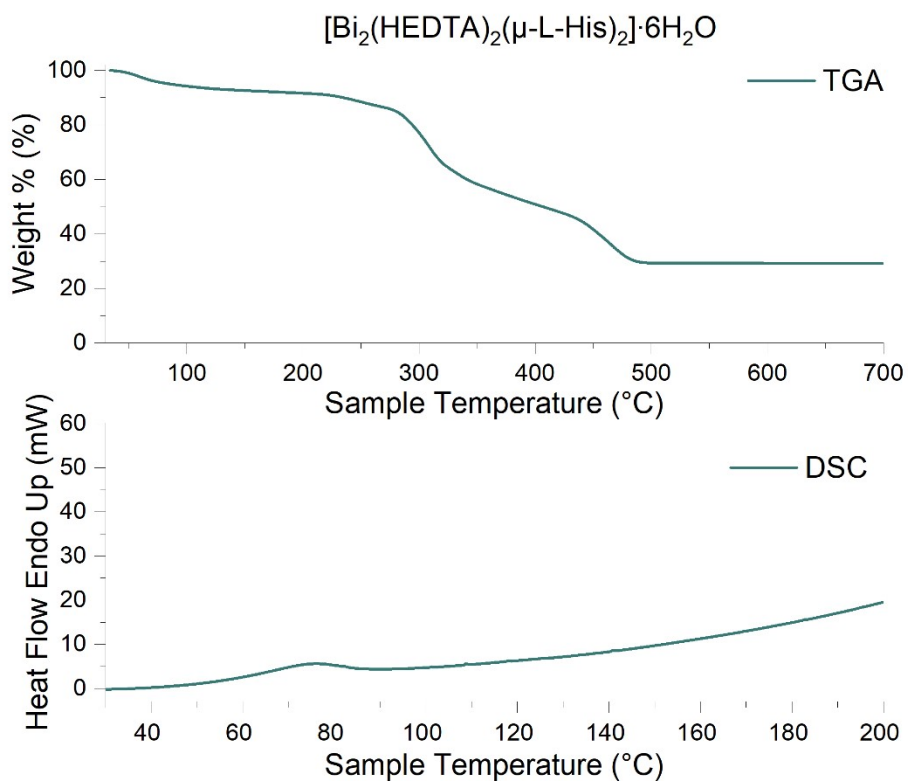

**Figure ESI 12:** TGA and DSC traces for  $[\text{Bi}_2(\text{HEDTA})_2(\mu\text{-L-His})_2]\cdot 6\text{H}_2\text{O}$  (**4**)



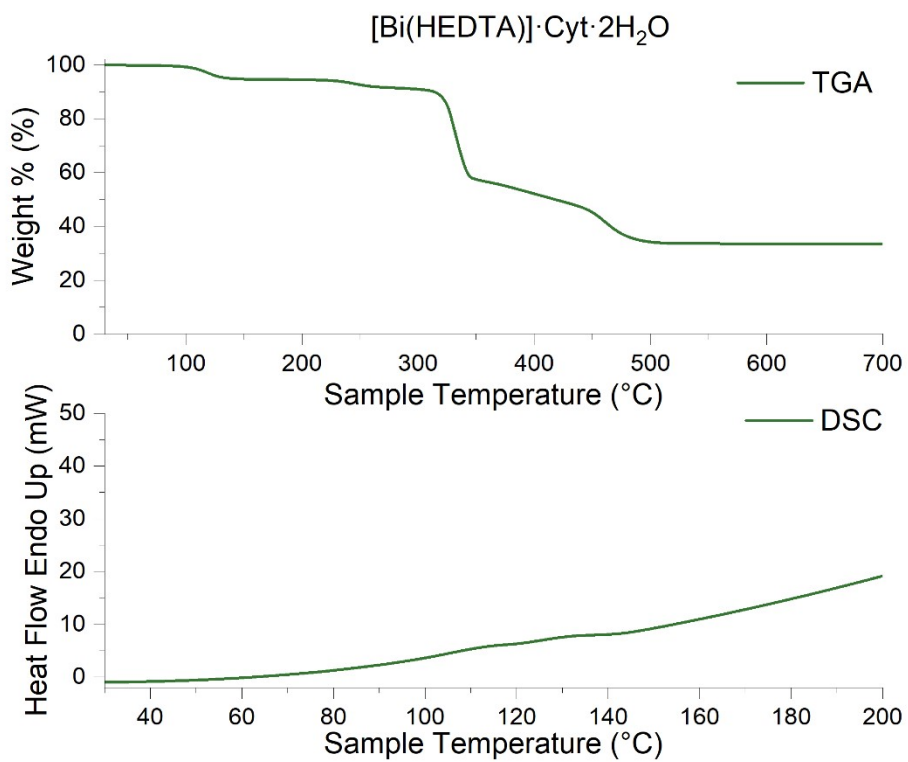

**Figure ESI 13.** TGA and DSC traces for [Bi(HEDTA)]·Cyt·2H<sub>2</sub>O (5)

#### 4. $^1\text{H}$ NMR

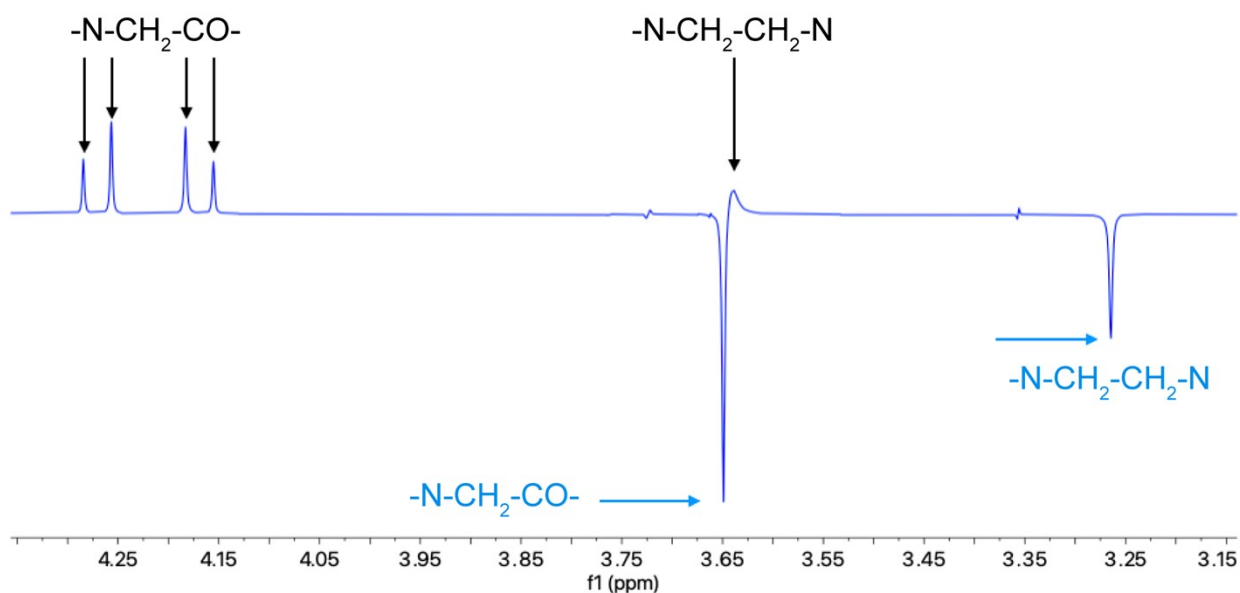

**Figure ESI 14.** Difference  $^1\text{H}$  NMR spectrum of 1 mM  $[\text{Bi}(\text{HEDTA})]\cdot 2\text{H}_2\text{O}$  (**1**) vs. 1 mM  $\text{H}_4\text{EDTA}$ , recorded in 50 mM phosphate buffer in  $\text{D}_2\text{O}$  at pD 7.5. The spectra were recorded on a Bruker Ascend 600 NMR spectrometer equipped with an Advance Neo console and a PRODIGY cryoprobe, operating at 599.74 MHz, using the “s2pul” pulse sequence. Spectral width: 16 ppm; number of scans: 120; acquisition time: 2.99 s; repetition delay: 1 s. The experiments were carried out at 298 K. Data were processed using the MestreNova software version 15. The spectrum of the free ligand shows two singlets at  $\delta = 3.26$  and 3.65 ppm (cyan), arising from the four acetate-methylene protons and the two backbone methylene groups, respectively. The spectrum of the Bi(III) complex shows signals of  $[\text{Bi}(\text{HEDTA})]$  (black) similar to those previously reported for  $^1\text{H}$  NMR spectra of EDTA complexes with different divalent metal ions.<sup>1</sup> In the case of the Bi(III) complex, both the methylene protons in the  $\text{N}-\text{CH}_2-\text{CH}_2-\text{N}$ - groups (appearing as a broadened singlet at  $\delta = 3.64$  ppm, indicative of a fluxional conformation behaviour), and the four acetate-methylene geminal protons in the  $\text{N}-\text{CH}_2-\text{CO}-$  group (appearing as sharp doublets in the  $\delta = 4.16 - 4.28$  ppm range) are shifted more downfield with respect to the free ligand as compared to the analogous chemical shifts of divalent metal ions,<sup>1</sup> due to the presence of the higher charge on the bound Bi(III). Two groups of acetate methylene protons are observed at 4.17 and 4.27 ppm; within each group, the two methylene protons have different chemical environments due to restricted rotation resulting in two different configurations,  $\Delta$  and  $\Lambda$ .<sup>2</sup> The two  $2J$  ( $^1\text{H}-^1\text{H}$ ) coupling constants are 16.64 and 16.65 Hz.

## 5. Antimicrobial activity tests

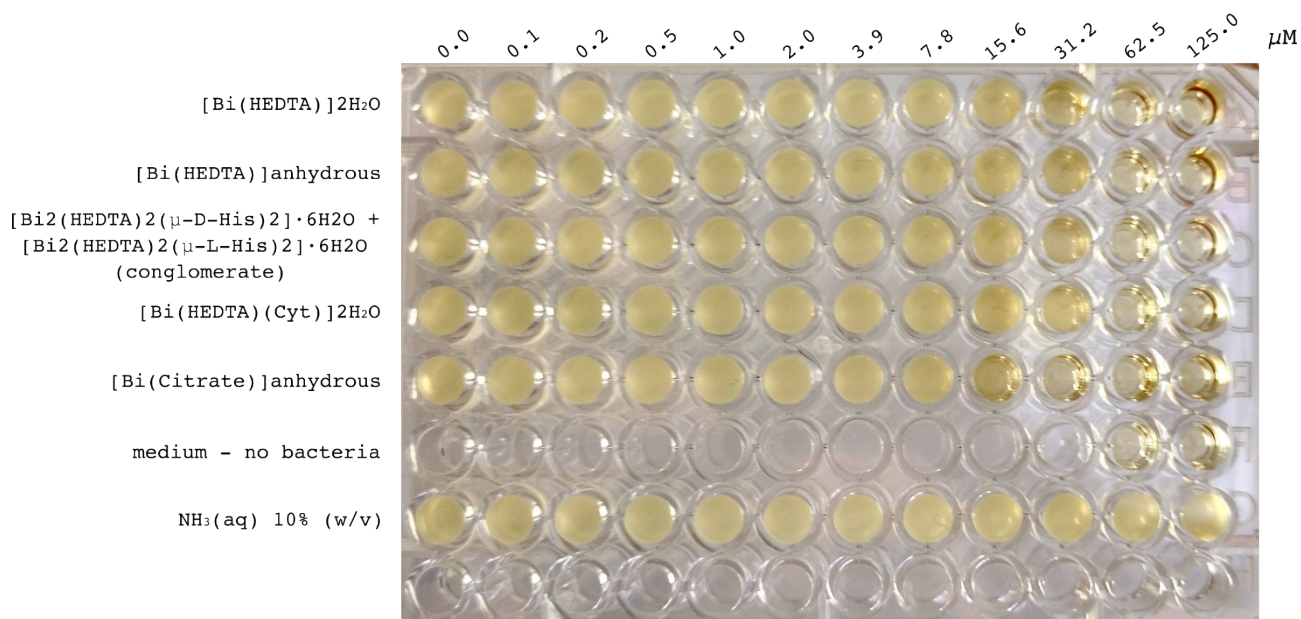

**Figure ESI 15:** Minimal inhibitory concentration (MIC) assay for the antimicrobial activity of Bismuth-containing compounds on *H. pylori* G27 liquid culture.

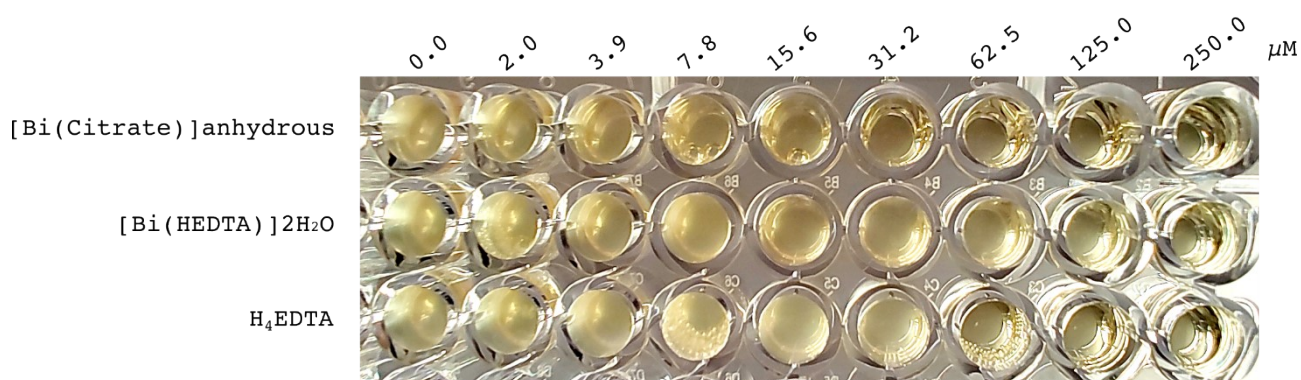

**Figure ESI 16:** Minimal inhibitory concentration (MIC) assay for the antimicrobial activity of Bismuth-containing compounds on *H. pylori* G27 liquid culture: comparison between [Bi(citrate)], [Bi(HEDTA)] $\cdot$ 2H<sub>2</sub>O and H<sub>4</sub>EDTA.

## 6. Bibliography

- 1 E. Hafer, U. Holzgrabe, K. Kraus, K. Adams, J. M. Hook and B. Diehl, *Magnetic Resonance in Chemistry*, 2020, **58**, 653–665.
- 2 M. C. Gennaro, P. Mirti and C. Casalino, *Polyhedron*, 1983, **2**, 13–18.
